# Supplementary material for: Selective detection of carbon monoxide (CO) gas by reduced graphene oxide (rGO) at room temperature
Source: Royal Society of Chemistry journal article supplement (doi:10.1039/c6ra06058g), 2016-01-01

## **SUPPORTING INFORMATION FOR**

### **Selective Detection of Carbon Monoxide (CO) Gas by Reduced Graphene Oxide (rGO) at Room Temperature**

**Dipankar Panda, Anupam Nandi, Swapan K Datta, Hiranmay Saha and Sanhita Majumdar\***

*Centre of Excellence for Green Energy and Sensor Systems, IEST, Shibpur, INDIA*

#### **Results and discussion**

The surface topography was examined and the height of different graphene flakes was measured using atomic force microscopy (AFM) and its associated height profile (Fig. S1). The dimensions of the graphene layer was about  $1\mu \times 1\mu$  and was mostly uniform. The topography measurement of the graphene surface level using AFM in the figure shows that the surface of the graphene is covered with regular network of mono-atomic steps. The color scale height variation is between 5 to 30 nm. The figure also depicts the presence of more than one overlapped sheets. This observation was further confirmed by the field emission scanning electron microscopy (FESEM; shown as inset of Fig. S2). From FESEM study, continuous layer of more than  $10\mu$  was observed, which is advantageous for device fabrication. It is reported that the step height of a mono layer graphene is  $5-10\text{ \AA}$ <sup>1</sup> and layer-to-layer spacing in bulk graphite is  $3.4\text{ \AA}$ .<sup>2</sup> Since, our synthesized graphene's inter-layer spacing was only  $3.6\text{ \AA}$  (obtained from x-ray analysis) so, we may confer that our sample consists of 2 to 3 nos. of graphene layers. From the height profile observation, it was found that the apparent height was 2 nm.

Ultraviolet-visible (UV-Viz.) spectra of reduced graphene oxide (RGO) is shown in Fig S2. The characteristic absorption peak at 265 nm is attributed to the excitation of  $\pi$  Plasmon of graphitic structure.<sup>3</sup>

#### **References**

- 1 J. Moser, A. Verdager, D. Jiménez, A. Barreiro, A. Bachtold, *Appl. Phys. Lett.*, 2008, **92**, 123507–123507-3.
- 2 M. Ishigami, J. H. Chen, W. G. Cullen, M. S. Fuhrer, E. D. Williams, *Nano Lett.*, 2007, **7**(6), 1643-1648.
- 3 G. Wang, X. Shen, J. Yao, J. Park, *Carbon*, 2009, **47**, 2049–2053.

## Figures

**Fig. S1:** AFM image of a multilayer graphene flake with height profile [INSET: FESEM micrograph of RGO].

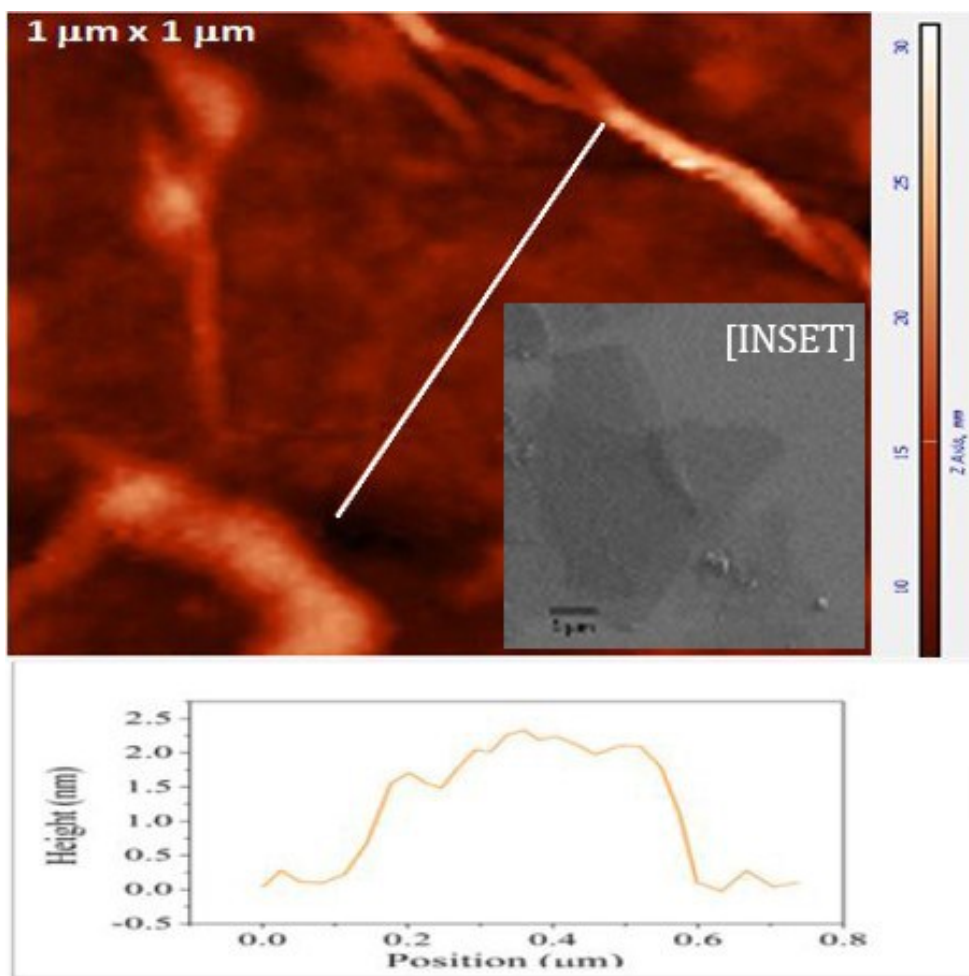

**Fig. S2:** UV-Visible spectra of RGO.

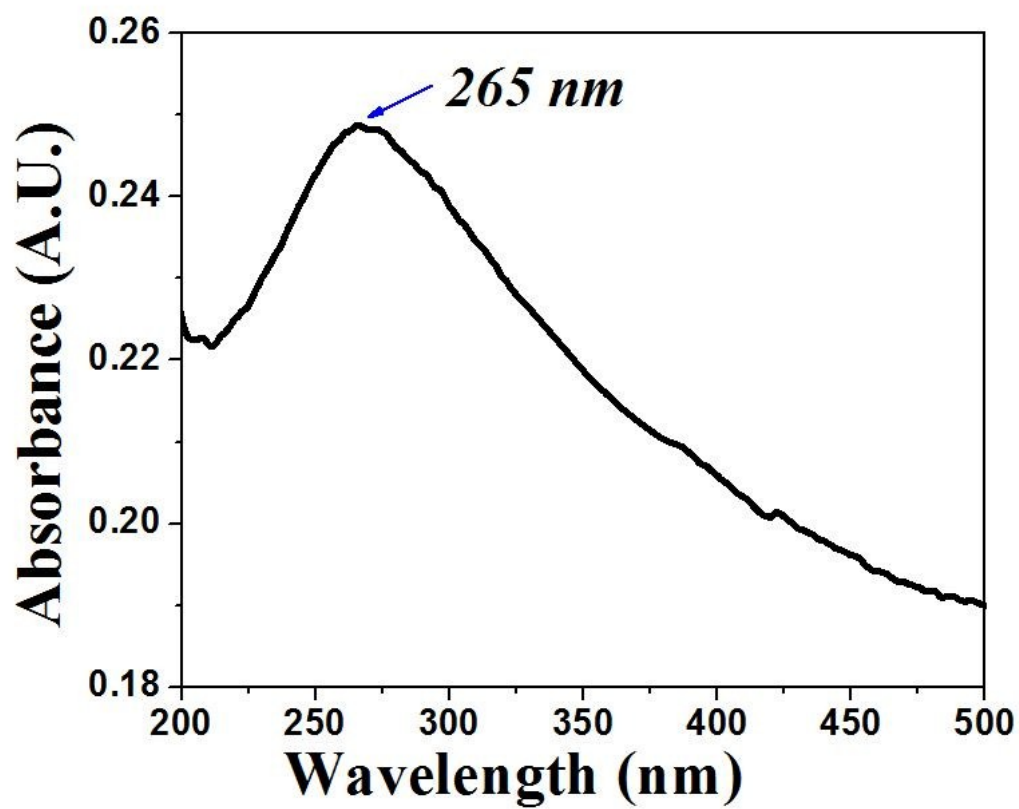

Supplement: c6ra06058g1.pdf [file c6ra06058g1.pdf]
